# Supplementary material for: Augmenting Granzyme B–Expressing NK Cells by Invariant NKT Ligand–Loaded APCs in Patients with Postoperative Early Stage Non–Small Cell Lung Cancer: Results of a Randomized Phase II Study
Source: PubMed Central journal article supplement — Immunohorizons. 2023 Jan 13;7(1):1–16. doi: 10.4049/immunohorizons.2200091 (PMC10563390; doi:10.4049/immunohorizons.2200091), 2023-01-13
Supplement: IH_2200091_Supplemental_1.pdf [file IH_2200091_Supplemental_1.pdf]

# New Supplemental figure 1

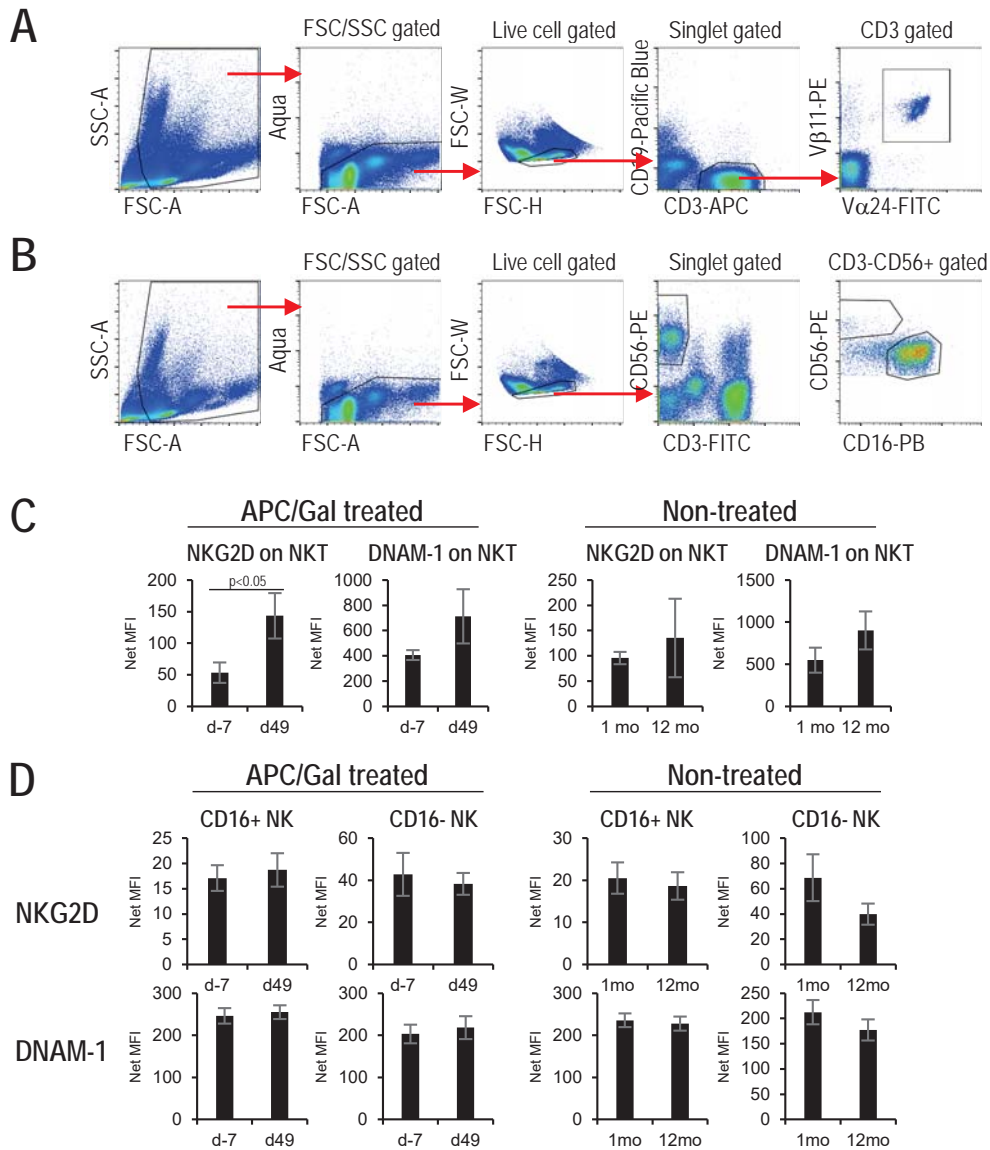

## Supplemental Figure 1 Gating strategies for iNKT cells and NK cells, and expression of stimulatory and co-receptor molecules of iNKT and NK cells before and after APC/Gal injection

(A) PBMCs were stained with FITC-Vα24, PE-Vβ11, APC-CD3, and Pacific Blue-CD19. Dead cells were labeled with Aqua (LIVE/DEAD™ Fixable Aqua Dead Cell Stain Kit). (B) PBMCs were stained with FITC-CD3, PE-CD56, Pacific Blue-CD16, and PE-Cy7-NKG2D, -DNAM-1, or isotype control. Dead cells were labeled with aqua. After gating out dead cells, NK cells were CD3-CD56+ cells, which were subsequently divided into two subsets by CD16 expression. (C) Alteration of stimulatory and co-receptor expression of iNKT cells. NKG2D and DNAM-1 expression is shown as geometric mean of the fluorescence intensity minus the isotype value. Results for ten patients in the treated group and five patients in the non-treated group are summarized, analyzed by Student's t-test. (D) Alteration of the stimulatory and co-receptor expression of NK cells. NKG2D and DNAM-1 expression is shown as geometric mean of the fluorescence intensity minus the isotype values. Results for 26 patients in the treated group and 23 in the non-treated group are summarized. No significant differences were observed in all groups.

**Supplemental Table I. Surface phenotypes of injected APC/Gal**

| Case No.          | Percentage of Cells $\pm$ SD |                 |                 |                 |
|-------------------|------------------------------|-----------------|-----------------|-----------------|
|                   | HLA-DR+                      | CD11c+          | CD86+           | CD3+            |
| 002               | 60.4 $\pm$ 17.4              | 38.6 $\pm$ 14.9 | 65.9 $\pm$ 28.5 | 82.6 $\pm$ 12.0 |
| 004               | 84.4 $\pm$ 7.6               | 45.5 $\pm$ 8.0  | 64.7 $\pm$ 27.4 | 58.8 $\pm$ 10.3 |
| 006               | 86.8 $\pm$ 2.8               | 24.9 $\pm$ 7.5  | 67.9 $\pm$ 18.7 | 90.6 $\pm$ 4.7  |
| 009               | 77.7 $\pm$ 10.7              | 32 $\pm$ 12.1   | 59.7 $\pm$ 17.5 | 77.0 $\pm$ 6.5  |
| 013               | 87.9 $\pm$ 6.4               | 56.5 $\pm$ 11.4 | 63.0 $\pm$ 28.0 | 73.3 $\pm$ 12.6 |
| 014               | 92.2 $\pm$ 6.4               | 50 $\pm$ 9.5    | 80.5 $\pm$ 18.6 | 53.9 $\pm$ 2.8  |
| 016               | 72.9 $\pm$ 18.3              | 33.7 $\pm$ 12.9 | 54.0 $\pm$ 29.8 | 65.5 $\pm$ 22.2 |
| 018               | 73.8 $\pm$ 7.2               | 53.9 $\pm$ 8.2  | 51.8 $\pm$ 18.5 | 71.8 $\pm$ 14.4 |
| 020               | 88.2 $\pm$ 5.7               | 50.3 $\pm$ 9.6  | 74.0 $\pm$ 22.3 | 79.7 $\pm$ 9.6  |
| 022               | 93.0 $\pm$ 4.4               | 69.4 $\pm$ 14.9 | 79.4 $\pm$ 7.5  | 88.5 $\pm$ 1.9  |
| 024               | 87.9 $\pm$ 6.9               | 52.2 $\pm$ 11.3 | 79.6 $\pm$ 12.9 | 52.6 $\pm$ 9.5  |
| 026               | 83.4 $\pm$ 7.8               | 55.3 $\pm$ 10.5 | 67.7 $\pm$ 20.2 | 82.8 $\pm$ 12.3 |
| 030               | 84.6                         | 32.1            | 57.4            | 70.1            |
| 034               | 90.1 $\pm$ 7.6               | 47 $\pm$ 5.8    | 78.9 $\pm$ 18.2 | 76.7 $\pm$ 8.0  |
| 035               | 80.3 $\pm$ 15.9              | 43.8 $\pm$ 16.4 | 76.6 $\pm$ 13.5 | 42.6 $\pm$ 16.9 |
| 038               | 82.4 $\pm$ 7.1               | 69.6 $\pm$ 9.4  | 68.1 $\pm$ 20.9 | 50.0 $\pm$ 6.4  |
| 039               | 81.2 $\pm$ 9.1               | 47.7 $\pm$ 10.6 | 74.3 $\pm$ 24.9 | 70.7 $\pm$ 8.3  |
| 040               | 89.7 $\pm$ 5.8               | 58.6 $\pm$ 11.0 | 78.5 $\pm$ 15.3 | 74.5 $\pm$ 31.6 |
| 041               | 94.4 $\pm$ 2.5               | 52.7 $\pm$ 11.5 | 87.0 $\pm$ 7.3  | 35.5 $\pm$ 4.7  |
| 043               | 77.5 $\pm$ 7.8               | 41.0 $\pm$ 9.3  | 67.9 $\pm$ 12.5 | 82.7 $\pm$ 9.1  |
| 045               | 90.1 $\pm$ 4.1               | 58.1 $\pm$ 13.6 | 83.7 $\pm$ 8.0  | 86.2 $\pm$ 4.8  |
| 046               | 79.5 $\pm$ 9.5               | 63.8 $\pm$ 10.4 | 50.5 $\pm$ 24.2 | 52.8 $\pm$ 19.9 |
| 047               | 90.0 $\pm$ 7.2               | 34.9 $\pm$ 6.1  | 69.9 $\pm$ 20.2 | 71.1 $\pm$ 4.8  |
| 049               | 85.2 $\pm$ 15.2              | 50.0 $\pm$ 16.6 | 75.1 $\pm$ 16.2 | 58.2 $\pm$ 18.3 |
| 051               | 92.8 $\pm$ 7.1               | 53.0 $\pm$ 12.2 | 80.1 $\pm$ 20.1 | 88.5 $\pm$ 4.4  |
| 054               | 84.0 $\pm$ 15.9              | 38.4 $\pm$ 11.2 | 71.9 $\pm$ 22.3 | 43.9 $\pm$ 15.2 |
| 055               | 87.0 $\pm$ 6.0               | 54.5 $\pm$ 10.0 | 76.7 $\pm$ 6.8  | 57.7 $\pm$ 22.8 |
| Average $\pm$ SEM | 84.3 $\pm$ 1.1               | 48.7 $\pm$ 1.4  | 70.8 $\pm$ 1.9  | 68.0 $\pm$ 1.9  |

**Supplemental Table II. Surface phenotypes of injected APC/Gal**

| Case No.          | Percentage of Cells $\pm$ SD          |                                       |                                      |                                      |                                     |                                     |
|-------------------|---------------------------------------|---------------------------------------|--------------------------------------|--------------------------------------|-------------------------------------|-------------------------------------|
|                   | HLA-DR <sup>+</sup> /CD3 <sup>+</sup> | HLA-DR <sup>+</sup> /CD3 <sup>-</sup> | CD11c <sup>+</sup> /CD3 <sup>+</sup> | CD11c <sup>+</sup> /CD3 <sup>-</sup> | CD86 <sup>+</sup> /CD3 <sup>+</sup> | CD86 <sup>+</sup> /CD3 <sup>-</sup> |
| 002               | 66.3 $\pm$ 19.9                       | 38.0 $\pm$ 13.5                       | 34.8 $\pm$ 24.6                      | 63.4 $\pm$ 17.4                      | n.d.                                | n.d.                                |
| 004               | 78.9 $\pm$ 7.6                        | 89.9 $\pm$ 5.2                        | 26.6 $\pm$ 5.8                       | 74.5 $\pm$ 4.2                       | n.d.                                | n.d.                                |
| 006               | 87.5 $\pm$ 3.4                        | 78.3 $\pm$ 19.8                       | 20.6 $\pm$ 8.4                       | 69.1 $\pm$ 10.7                      | 71.8                                | 31.4                                |
| 009               | 79.0 $\pm$ 13.5                       | 73.2 $\pm$ 6.4                        | 27.3 $\pm$ 15.0                      | 62.7 $\pm$ 22.6                      | 67.7 $\pm$ 21.3                     | 33.6 $\pm$ 12.1                     |
| 013               | 87.8 $\pm$ 9.1                        | 83.5 $\pm$ 10.8                       | 44.9 $\pm$ 19.0                      | 83.2 $\pm$ 6.3                       | 68.0 $\pm$ 28.4                     | 42.5 $\pm$ 24.4                     |
| 014               | 88.4 $\pm$ 10.7                       | 97.6 $\pm$ 0.6                        | 27.7 $\pm$ 10.0                      | 74.4 $\pm$ 7.4                       | 78.8 $\pm$ 21.8                     | 78.9 $\pm$ 15.4                     |
| 016               | 70.1 $\pm$ 22.1                       | 82.5 $\pm$ 13.1                       | 20.2 $\pm$ 11.0                      | 74.1 $\pm$ 8.3                       | 56.0 $\pm$ 32.1                     | 48.8 $\pm$ 32.3                     |
| 018               | 74.0 $\pm$ 12.8                       | 64.3 $\pm$ 21.6                       | 39.0 $\pm$ 18.9                      | 78.2 $\pm$ 9.5                       | 59.0 $\pm$ 21.5                     | 15.5 $\pm$ 5.4                      |
| 020               | 87.0 $\pm$ 8.5                        | 92.8 $\pm$ 1.1                        | 45.5 $\pm$ 18.4                      | 73.0 $\pm$ 7.6                       | 72.7 $\pm$ 23.1                     | 73.3 $\pm$ 20.8                     |
| 022               | 94.7 $\pm$ 4.0                        | 81.7 $\pm$ 7.9                        | 68.4 $\pm$ 14.3                      | 74.4 $\pm$ 16.3                      | 82.1 $\pm$ 6.8                      | 61.5 $\pm$ 13.3                     |
| 024               | 81.1 $\pm$ 12.1                       | 95.1 $\pm$ 2.3                        | 30.4 $\pm$ 17.5                      | 73.9 $\pm$ 11.9                      | 75.2 $\pm$ 15.4                     | 83.4 $\pm$ 10.8                     |
| 026               | 82.2 $\pm$ 10.3                       | 85.8 $\pm$ 3.5                        | 49.8 $\pm$ 12.4                      | 80.5 $\pm$ 8.0                       | 69.9 $\pm$ 18.8                     | 49.3 $\pm$ 23.1                     |
| 030               | 86.0                                  | 81.6                                  | 17.6                                 | 68.5                                 | 67.4                                | 27.6                                |
| 034               | 89.0 $\pm$ 9.0                        | 92.9 $\pm$ 4.8                        | 37.6 $\pm$ 7.7                       | 76.2 $\pm$ 8.8                       | 77.3 $\pm$ 20.5                     | 74.4 $\pm$ 16.8                     |
| 035               | 70.0 $\pm$ 30.9                       | 89.7 $\pm$ 8.1                        | 28.9 $\pm$ 18.5                      | 55.5 $\pm$ 13.9                      | 65.3 $\pm$ 28.9                     | 85.1 $\pm$ 11.1                     |
| 038               | 79.0 $\pm$ 10.2                       | 86.8 $\pm$ 5.5                        | 53.8 $\pm$ 17.8                      | 85.1 $\pm$ 2.7                       | 65.3 $\pm$ 23.1                     | 68.7 $\pm$ 19.9                     |
| 039               | 78.5 $\pm$ 14.9                       | 86.4 $\pm$ 6.6                        | 37.1 $\pm$ 12.1                      | 72.0 $\pm$ 14.1                      | 72.1 $\pm$ 28.1                     | 73.6 $\pm$ 21.3                     |
| 040               | 89.2 $\pm$ 10.2                       | 71.7 $\pm$ 20.1                       | 51.7 $\pm$ 17.4                      | 77.1 $\pm$ 11.3                      | 81.4 $\pm$ 15.5                     | 44.9 $\pm$ 21.3                     |
| 041               | 88.7 $\pm$ 5.9                        | 98.0 $\pm$ 1.0                        | 19.4 $\pm$ 10.8                      | 70.6 $\pm$ 10.9                      | 81.9 $\pm$ 12.0                     | 89.7 $\pm$ 4.3                      |
| 043               | 78.1 $\pm$ 8.2                        | 74.6 $\pm$ 17.9                       | 35.1 $\pm$ 12.2                      | 77.2 $\pm$ 12.7                      | 69.8 $\pm$ 11.0                     | 53.4 $\pm$ 26.3                     |
| 045               | 89.7 $\pm$ 4.5                        | 93.8 $\pm$ 2.6                        | 55.2 $\pm$ 14.1                      | 72.4 $\pm$ 9.8                       | 84.1 $\pm$ 7.7                      | 78.8 $\pm$ 10.6                     |
| 046               | 74.6 $\pm$ 17.1                       | 81.4 $\pm$ 2.2                        | 42.4 $\pm$ 24.4                      | 81.5 $\pm$ 5.4                       | 54.8 $\pm$ 27.1                     | 40.5 $\pm$ 15.4                     |
| 047               | 87.9 $\pm$ 10.0                       | 96.0 $\pm$ 1.8                        | 16.5 $\pm$ 3.3                       | 81.0 $\pm$ 5.5                       | 73.6 $\pm$ 21.4                     | 57.6 $\pm$ 23.5                     |
| 049               | 74.6 $\pm$ 29.5                       | 94.0 $\pm$ 8.5                        | 34.7 $\pm$ 19.8                      | 70.9 $\pm$ 16.6                      | 66.7 $\pm$ 30.0                     | 78.1 $\pm$ 7.9                      |
| 051               | 92.7 $\pm$ 7.7                        | 94.5 $\pm$ 3.8                        | 48.9 $\pm$ 14.2                      | 82.7 $\pm$ 7.9                       | 80.6 $\pm$ 20.9                     | 69.1 $\pm$ 17.0                     |
| 054               | 72.6 $\pm$ 23.3                       | 97.3 $\pm$ 1.4                        | 24.2 $\pm$ 4.9                       | 54.0 $\pm$ 27.4                      | 60.9 $\pm$ 22.9                     | 80.0 $\pm$ 21.5                     |
| 055               | 79.6 $\pm$ 10.3                       | 95.3 $\pm$ 4.3                        | 34.5 $\pm$ 5.9                       | 76.3 $\pm$ 9.4                       | 67.2 $\pm$ 14.2                     | 84.9 $\pm$ 6.9                      |
| Average $\pm$ SEM | 81.7 $\pm$ 1.4                        | 85.1 $\pm$ 1.5                        | 36.4 $\pm$ 1.8                       | 73.5 $\pm$ 1.3                       | 70.8 $\pm$ 6.8                      | 62.3 $\pm$ 8.4                      |

n.d., not determined

**Supplemental Table III. NKT and NK cell responses of non-treated patients at 12-month**

| Case No. | Base line NKT (%) | NKT (12m) <sup>#</sup> | Base line NK (%) | NK (12m) <sup>#</sup> | ELISPOT (12m) <sup>§</sup> | NK GzmB (12m) |
|----------|-------------------|------------------------|------------------|-----------------------|----------------------------|---------------|
| 052      | N.D.              | 0.09                   | N.D.             | 14                    | 97                         | 138.5         |
| 032      | 0.081             | 0.14                   | 2.9              | 3.67                  | 86.0                       | 1.0           |
| 048      | 0.000345          | 0.000211               | 2.4              | 2.66                  | 72.0                       | 2.3           |
| 057      | 0.01              | 0.013                  | 8.4              | 5.44                  | 42.0                       | 1128.5        |
| 044      | 0.015             | 0.016                  | 8.5              | 5.96                  | 25.5                       | 2.7           |
| 012      | 0.00589           | 0.00212                | 6.7              | 6.01                  | 23.0                       | 6.8           |
| 019      | 0.00482           | 0.00321                | 9.1              | 15.4                  | 16.5                       | 1.4           |
| 010      | 0.011             | 0.00412                | 8.3              | 10.3                  | 12.5                       | 0.5           |
| 042      | 0.018             | 0.022                  | 14.5             | 16.4                  | 10.0                       | 0.2           |
| 015      | 0.00596           | 0.00455                | 9.2              | 13.1                  | 8.0                        | 2.9           |
| 031      | 0.00815           | 0.024                  | 9.7              | 11.6                  | 7.5                        | 0.0           |
| 029      | 0.00407           | 0.00643                | 17.1             | 22.1                  | 7.0                        | 0.0           |
| 001      | N.D.              | 0.00584                | n.d.             | 16.1                  | 6.5                        | 6.4           |
| 007      | 0.01              | 0.00258                | 15.9             | 11.7                  | 3.5                        | 1.5           |
| 005      | 0.009             | 0.00951                | 4.8              | 8.54                  | 3.0                        | 1.0           |
| 008      | 0.013             | 0.012                  | 7.1              | 4.54                  | 2.5                        | 0.9           |
| 011      | 0.00456           | 0.00332                | 15.8             | 16                    | 2.0                        | 1.8           |
| 023      | 0.00149           | 0.00679                | 31.2             | 11.3                  | 1.5                        | 2.8           |
| 033      | 0.11              | 0.00543                | 4.7              | 4.36                  | 1.5                        | 0.0           |
| 053      | 0.00756           | 0.00519                | 8.9              | 7.15                  | 1.5                        | 457.6         |
| 027      | 0.000949          | 0.027                  | 9.6              | 8.31                  | 1.0                        | 0.0           |
| 036      | 0.00257           | 0.00396                | 9.9              | 7.49                  | 1.0                        | 0.7           |
| 017      | 0.00209           | 0.00397                | 18.0             | 24.3                  | 0.5                        | 0.8           |
| 058      | 0.00142           | 0.00421                | 8.4              | 10.9                  | 0.0                        | 152.7         |
| 021      | 0.00912           | n.d.                   | 5.9              | n.d.                  | n.d.                       | n.d.          |
| 025      | 0.00403           | n.d.                   | 5.1              | n.d.                  | n.d.                       | n.d.          |
| 028      | 0.011             | n.d.                   | 11.9             | n.d.                  | n.d.                       | n.d.          |
| 037      | 0.0062            | n.d.                   | 6.6              | n.d.                  | n.d.                       | n.d.          |
| 056      | 0.01              | n.d.                   | 48.9             | n.d.                  | n.d.                       | n.d.          |

<sup>#</sup> Fold increase of 12-month to base line in NKT cell or NK cell number during treatment.

<sup>§</sup> ELISPOT fold increase of 12-month to base line in IFN- $\gamma$ -producing cell number. n.d., not determine.

The line in the table shows the boundary of 2.0 times increase rate of ELISPOT on 12-month.
